# Supplementary material
Source: publisher figshare collection journal article supplement (https://geolsoc.figshare.com/ndownloader/files/22475858)
Supplement: Supplementary file 1 [file 22475858]

## Sheet: Sheet1
Comment	AT11																																			AT15
SiO2	46.036	43.886	47.924	46.105	45.497	48.753	46.722	52.736	52.176	48.749	45.719	46.645	44.382	47.089	47.254	45.806	48.313	46.312	46.493	47.397	45.504	46.557	45.843	46.55	54.628	59.208	66.355	49.698	46.794	46.122	46.988	46.871	44.353	44.765		45.756	45.851	45.664	46.864	46.258	46.352	47.43	45.966	45.707	46.058	46.333	46.792	46.47	46.224
TiO2	0.072	0.053	0	0.015	0	0	0.095	0	0	0.095	0	0.098	0	0.079	0.045	0.008	0	0	0.087	0	0	0	0.038	0.072	0.098	0.023	0.214	0.057	0	0.027	0	0.034	0.019	0.129		0.004	0.026	0.117	0.064	0.049	0.136	0	0	0	0.129	0.034	0.041	0	0.151
Al2O3	34.831	33.125	32.539	34.482	35.134	31.946	33.827	31.057	29.987	33.478	34.41	34.378	34.912	33.873	34.364	34.864	32.4	34.345	34.353	34.11	35.072	34.113	34.605	34.965	28.808	25.219	21.167	28.703	34.586	34.642	34.218	34.872	30.383	30.531		34.76	34.1	34.852	34.73	35.021	34.447	34.229	35.224	34.962	34.315	34.383	34.157	33.861	35.381
Cr2O3	0.038	0.067	0	0.031	0.016	0.078	0	0	0	0.087	0.003	0	0	0	0	0	0	0	0.026	0.005	0.014	0.044	0.018	0	0	0.058	0.085	0.019	0	0	0	0	0	0.044		0.012	0.026	0	0	0	0.066	0.021	0	0	0.035	0.01	0	0	0.014
FeO	0.298	3.234	1.087	0.344	0.424	0.424	0.309	0.486	0.302	0.304	0.246	0.33	0.355	0.369	0.376	0.305	0.238	0.263	0.288	0.33	0.308	0.166	0.383	0.281	0.363	0.433	0.095	1.084	0.383	0.297	0.309	0.191	1.694	0.66		0.285	0.217	0.363	0.299	0.216	0.33	0.267	0.341	0.289	0.386	0.306	0.391	0.381	0.288
MnO	0.011	0.14	0.026	0.041	0.052	0	0.102	0.028	0	0.027	0	0	0	0	0	0.005	0	0	0.083	0.042	0	0.031	0.025	0	0.06	0	0	0.16	0.028	0.024	0	0.017	0.026	0.08		0	0.06	0.031	0	0	0.022	0	0	0	0	0	0	0.026	0
MgO	0.017	0.6	0.174	0.018	0.028	0.072	0	0.259	0.043	0.021	0.015	0.016	0.03	0.018	0.002	0.029	0.012	0.02	0.049	0.046	0.027	0.013	0.006	0.023	0.047	0.02	0.067	0.064	0.007	0.026	0.024	0.008	0.073	0.026		0	0.004	0.004	0.026	0	0.016	0.032	0.037	0.037	0.014	0.007	0.03	0.034	0.021
CaO	17.215	16.171	15.547	17.839	18.381	14.002	16.498	12.183	12.775	16.307	18.427	17.68	17.603	16.572	17.254	17.636	15.738	16.457	17.719	16.268	18.582	17.422	17.261	17.916	10.639	8.228	0.782	16.375	17.581	17.434	17.318	17.663	20.658	19.91		17.717	16.566	18.006	17.673	17.201	17.473	17.075	17.24	18.196	18.511	17.71	17.548	17.051	18.725
Na2O	1.677	1.674	2.713	1.852	1.662	3.036	2.3	4.49	4.332	2.689	1.668	1.986	1.692	1.984	2.142	1.55	2.751	1.723	1.855	2.066	1.457	1.948	1.754	1.584	5.361	7.23	10.829	3.469	1.698	2.084	2.405	2.024	2.142	3.506		1.559	2.153	1.672	2.052	1.596	1.709	2.3	1.674	1.615	1.649	1.969	2.034	2.07	1.577
K2O	0.013	0.017	0.008	0.003	0.014	0.013	0.012	0.066	0.073	0.017	0.021	0.021	0.012	0.042	0.027	0.018	0.03	0.018	0.037	0.036	0.006	0.015	0.027	0.009	0.093	0	0.029	0.002	0.027	0.051	0.054	0.009	0.001	0.018		0.027	0.021	0.01	0.023	0.016	0.017	0.017	0.025	0.025	0.014	0.039	0.046	0.046	0.022
Total	100.387	99.028	100.158	100.815	101.353	98.393	99.9	101.43	99.914	101.816	100.721	101.231	99.106	100.197	101.758	100.252	99.56	99.186	101.155	100.49	100.995	100.397	99.993	101.412	100.106	100.421	99.729	99.655	101.118	100.707	101.323	101.699	99.357	99.691		100.199	99.074	100.734	101.831	100.558	100.58	101.541	100.607	100.917	101.138	100.852	101.079	100.12	102.41
Normolized to 8 O
Si	2.114	2.06471	2.20112	2.11297	2.07996	2.26064	2.1513	2.35969	2.37555	2.19938	2.10261	2.12629	2.07097	2.16084	2.14375	2.1052	2.22453	2.14173	2.12381	2.16628	2.08338	2.13778	2.11257	2.1145	2.46177	2.64052	2.91641	2.30357	2.13057	2.11253	2.13847	2.12346	2.10318	2.11531		2.10604	2.13033	2.09364	2.12361	2.1178	2.1236	2.15268	2.10418	2.09319	2.10697	2.12083	2.13508	2.14127	2.08694
Ti	0.00248652	0.00187526	0	0.000516998	0	0	0.00328969	0	0	0.00322337	0	0.00335966	0	0.00272635	0.00153532	0.000276512	0	0	0.00298882	0	0	0	0.00131696	0.00245964	0.00332132	0.000771416	0.00707361	0.00198696	0	0.000930059	0	0.00115843	0.000677579	0.00458433		0.000138462	0.000908495	0.00403428	0.00218105	0.00168712	0.00468591	0	0	0	0.00443807	0.00117043	0.00140695	0	0.0051271
Al	1.88527	1.83692	1.76155	1.86268	1.89322	1.74601	1.83588	1.63798	1.60927	1.78031	1.8653	1.84714	1.92018	1.83213	1.83755	1.88864	1.75841	1.87212	1.84967	1.83758	1.89269	1.84628	1.87965	1.87207	1.53019	1.32568	1.09657	1.56816	1.85612	1.87025	1.83558	1.86216	1.69819	1.7005		1.88581	1.86746	1.88346	1.85498	1.88985	1.86018	1.83114	1.90058	1.88723	1.85028	1.85507	1.83706	1.83908	1.88284
Fe	0.0102978	0.114497	0.03757	0.0118638	0.0145868	0.014795	0.0107068	0.0163646	0.0103472	0.0103212	0.00851371	0.0113202	0.0124657	0.0127424	0.0128364	0.0105485	0.00824655	0.00915266	0.00990015	0.0113501	0.0106118	0.00573597	0.0132818	0.00960539	0.0123101	0.0145317	0.0031421	0.0378106	0.0131228	0.010237	0.0105827	0.00651169	0.0604489	0.0234693		0.00987151	0.00758714	0.0125244	0.0101959	0.00744169	0.0113773	0.00911926	0.0117468	0.00995969	0.013288	0.0105404	0.0134258	0.0132113	0.00978491
Mg	0.0011637	0.0420794	0.0119131	0.00122971	0.00190816	0.00497677	0	0.0172756	0.00291842	0.00141234	0.00102835	0.00108723	0.00208676	0.00123129	0.000135254	0.00198681	0.000823647	0.00137875	0.00333665	0.00313406	0.00184276	0.000889829	0.000412168	0.0015574	0.0031573	0.00132961	0.00438971	0.00442211	0.000475105	0.00177523	0.00162822	0.000540275	0.00516016	0.00183144		0	0.00027704	0.000273385	0.00175628	0	0.00109272	0.00216503	0.00252484	0.00252589	0.000954699	0.000477638	0.00204056	0.00233541	0.00141335
Mn	0.000427861	0.00557909	0.0010115	0.0015916	0.00201362	0	0.00397816	0.00106123	0	0.00103181	0	0	0	0	0	0.000194646	0	0	0.00321151	0.00162598	0	0.00120571	0.000975843	0	0.00229027	0	0	0.00628183	0.00107986	0.000931127	0	0.000652365	0.00104431	0.00320204		0	0.0023613	0.00120391	0	0	0.000853746	0	0	0	0	0	0	0.00101479	0
Ca	0.847037	0.815187	0.765112	0.876	0.900386	0.695676	0.81395	0.584104	0.623221	0.788308	0.90804	0.86355	0.880116	0.814827	0.838713	0.868479	0.776446	0.815471	0.867271	0.796683	0.911589	0.857162	0.852296	0.871999	0.513714	0.393179	0.0368273	0.813265	0.857702	0.855617	0.844505	0.857415	1.04961	1.00808		0.873767	0.824712	0.884573	0.858089	0.843798	0.857745	0.830377	0.845611	0.892874	0.90734	0.868602	0.857942	0.841853	0.905842
Na	0.149319	0.152708	0.241609	0.164574	0.147325	0.272963	0.205343	0.389554	0.382433	0.235233	0.148741	0.175538	0.153087	0.17653	0.188421	0.138126	0.245606	0.1545	0.164303	0.183091	0.129346	0.173436	0.156726	0.139513	0.468438	0.625202	0.922862	0.311775	0.149905	0.185083	0.212229	0.177796	0.196946	0.321233		0.139135	0.193961	0.148641	0.180296	0.141678	0.151816	0.202408	0.148585	0.143408	0.146267	0.174757	0.179956	0.184945	0.138054
K	0.00076156	0.00102032	0.000468742	0.000175396	0.000816494	0.000768999	0.000704877	0.00376743	0.00424004	0.000978444	0.00123207	0.00122121	0.000714332	0.0024587	0.00156262	0.00105535	0.00176217	0.00106193	0.00215617	0.00209903	0.000350448	0.000878662	0.00158728	0.000521535	0.00534649	0	0.00162602	0.000118262	0.00156828	0.00298001	0.00313519	0.000520157	6.04933e-05	0.00108508		0.00158538	0.00124471	0.0005849	0.00132958	0.00093448	0.000993586	0.000984304	0.00145995	0.00146056	0.000817022	0.00227736	0.00267765	0.00270402	0.00126712
Total cations	5.01077	5.03457	5.02036	5.03161	5.04021	4.99583	5.02515	5.0098	5.00798	5.02019	5.03547	5.0295	5.03961	5.00349	5.02451	5.01451	5.01582	4.99542	5.02665	5.00185	5.02981	5.02337	5.01881	5.01222	5.00054	5.00121	4.9889	5.0474	5.01054	5.04033	5.04613	5.03021	5.11532	5.17928		5.01634	5.02884	5.02894	5.03244	5.00318	5.01234	5.02888	5.01468	5.03065	5.03035	5.03372	5.02959	5.02641	5.03128
An wt%	85.6856	84.9025	77.0263	84.9416	86.5701	72.9426	80.7327	61.1594	63.0835	77.9724	86.5236	83.8213	85.8545	82.8348	82.3985	86.8716	76.8981	84.7543	84.6701	82.0175	88.1737	83.9108	85.0928	86.8507	53.4787	40.0194	4.05449	73.4491	85.7217	82.8243	80.6071	83.6079	84.9678	76.8384		86.8127	81.7536	86.2778	83.3615	86.2538	85.6174	81.2387	85.6643	86.7284	86.7419	83.8743	83.2759	82.6253	87.3325
Ab wt%	14.2374	14.9911	22.9265	15.0413	13.3514	26.9767	19.1974	38.446	36.4871	21.9307	13.3589	16.0601	14.0758	16.9151	17.4479	13.0228	22.9273	15.1353	15.1193	17.7663	11.7924	16.0031	14.7486	13.0973	45.9644	59.9806	95.7664	26.5402	14.1215	16.8871	19.0935	16.3414	15.0273	23.0789		13.0297	18.1229	13.6651	16.5093	13.6506	14.2834	18.6649	14.1877	13.1297	13.18	15.9057	16.4641	17.1092	12.5453
Or wt%	0.0770754	0.106317	0.0472122	0.0170154	0.0785414	0.0806689	0.0699473	0.394661	0.429388	0.096825	0.117455	0.118594	0.0697155	0.250068	0.153591	0.105614	0.174606	0.110422	0.210603	0.216195	0.0339132	0.0860563	0.158549	0.0519692	0.556846	0	0.179101	0.0106858	0.156813	0.288604	0.299392	0.0507454	0.00489934	0.0827468		0.15759	0.123447	0.057076	0.129227	0.0955688	0.0992236	0.0963436	0.14797	0.141937	0.0781445	0.220012	0.260028	0.265517	0.122222
[truncated: 326 more columns]
